# Supplementary material
Source: PubMed Central journal article supplement (PMC7308046)
Supplement: jciinsight-5-135344-s106.pdf [file jciinsight-5-135344-s106.pdf]

**A**

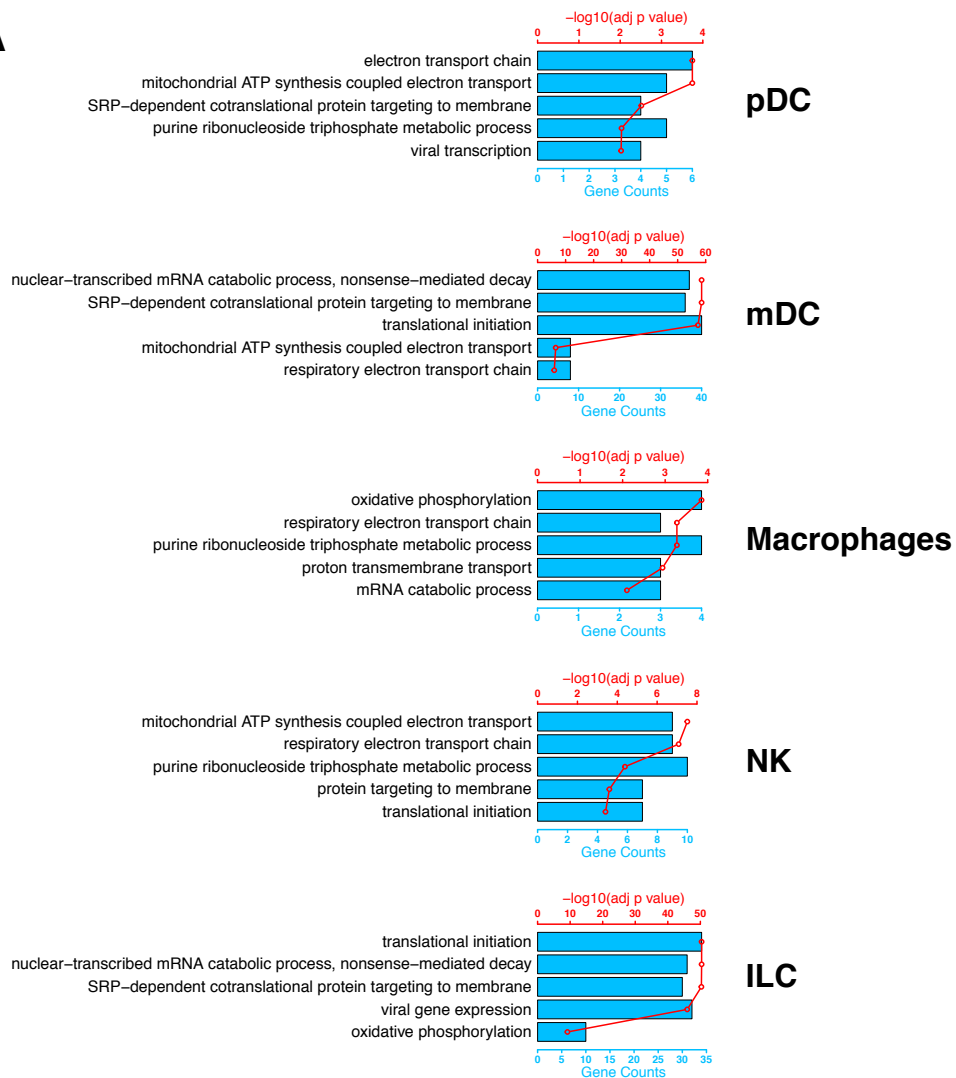

**B**

downregulated genes

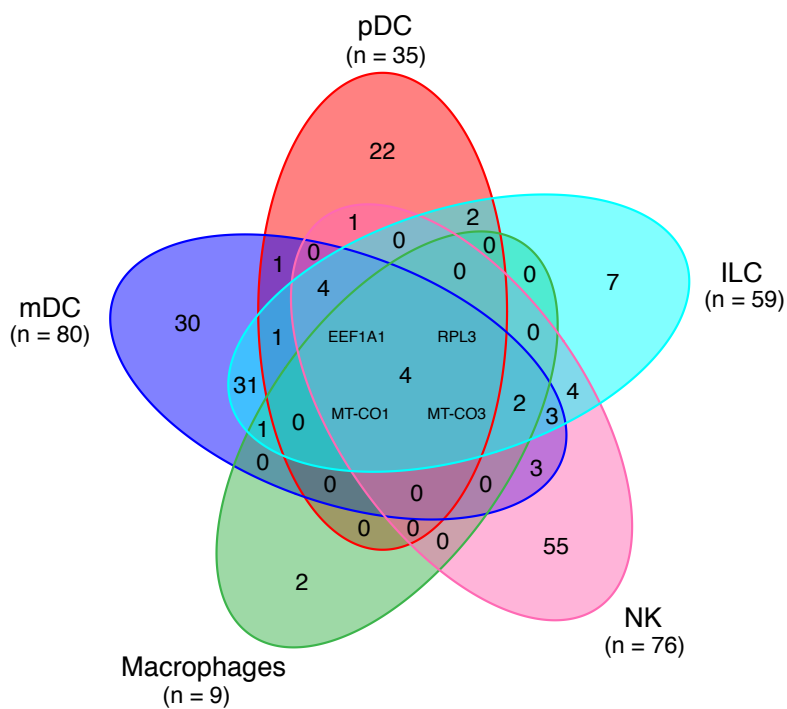

**Figure S1. Venn diagram showing overlap of genes differentially modulated by HIV-1 for each innate immune subset.** Experiments were performed as in Figure 2. **(A)** GO term analysis of down-regulated pathways by HIV-1 in pDC, mDC, macrophage, NK and ILC. The red points connected by a red line indicate the  $-\log_{10}$  Benjamini-Hochberg adjusted p values for enrichment of the down-regulated genes for the specified biological process with the scale on the top axis. The blue bars indicate the number of down-regulated genes found in the specified biological process with the scale on the bottom axis. **(B)** Venn diagram showing overlap of genes downregulated by HIV-1 for each of the 5 innate immune subsets. The differentially modulated genes common to all 5 innate immune subsets were listed in the center region of each Venn diagram.

# Figure S2

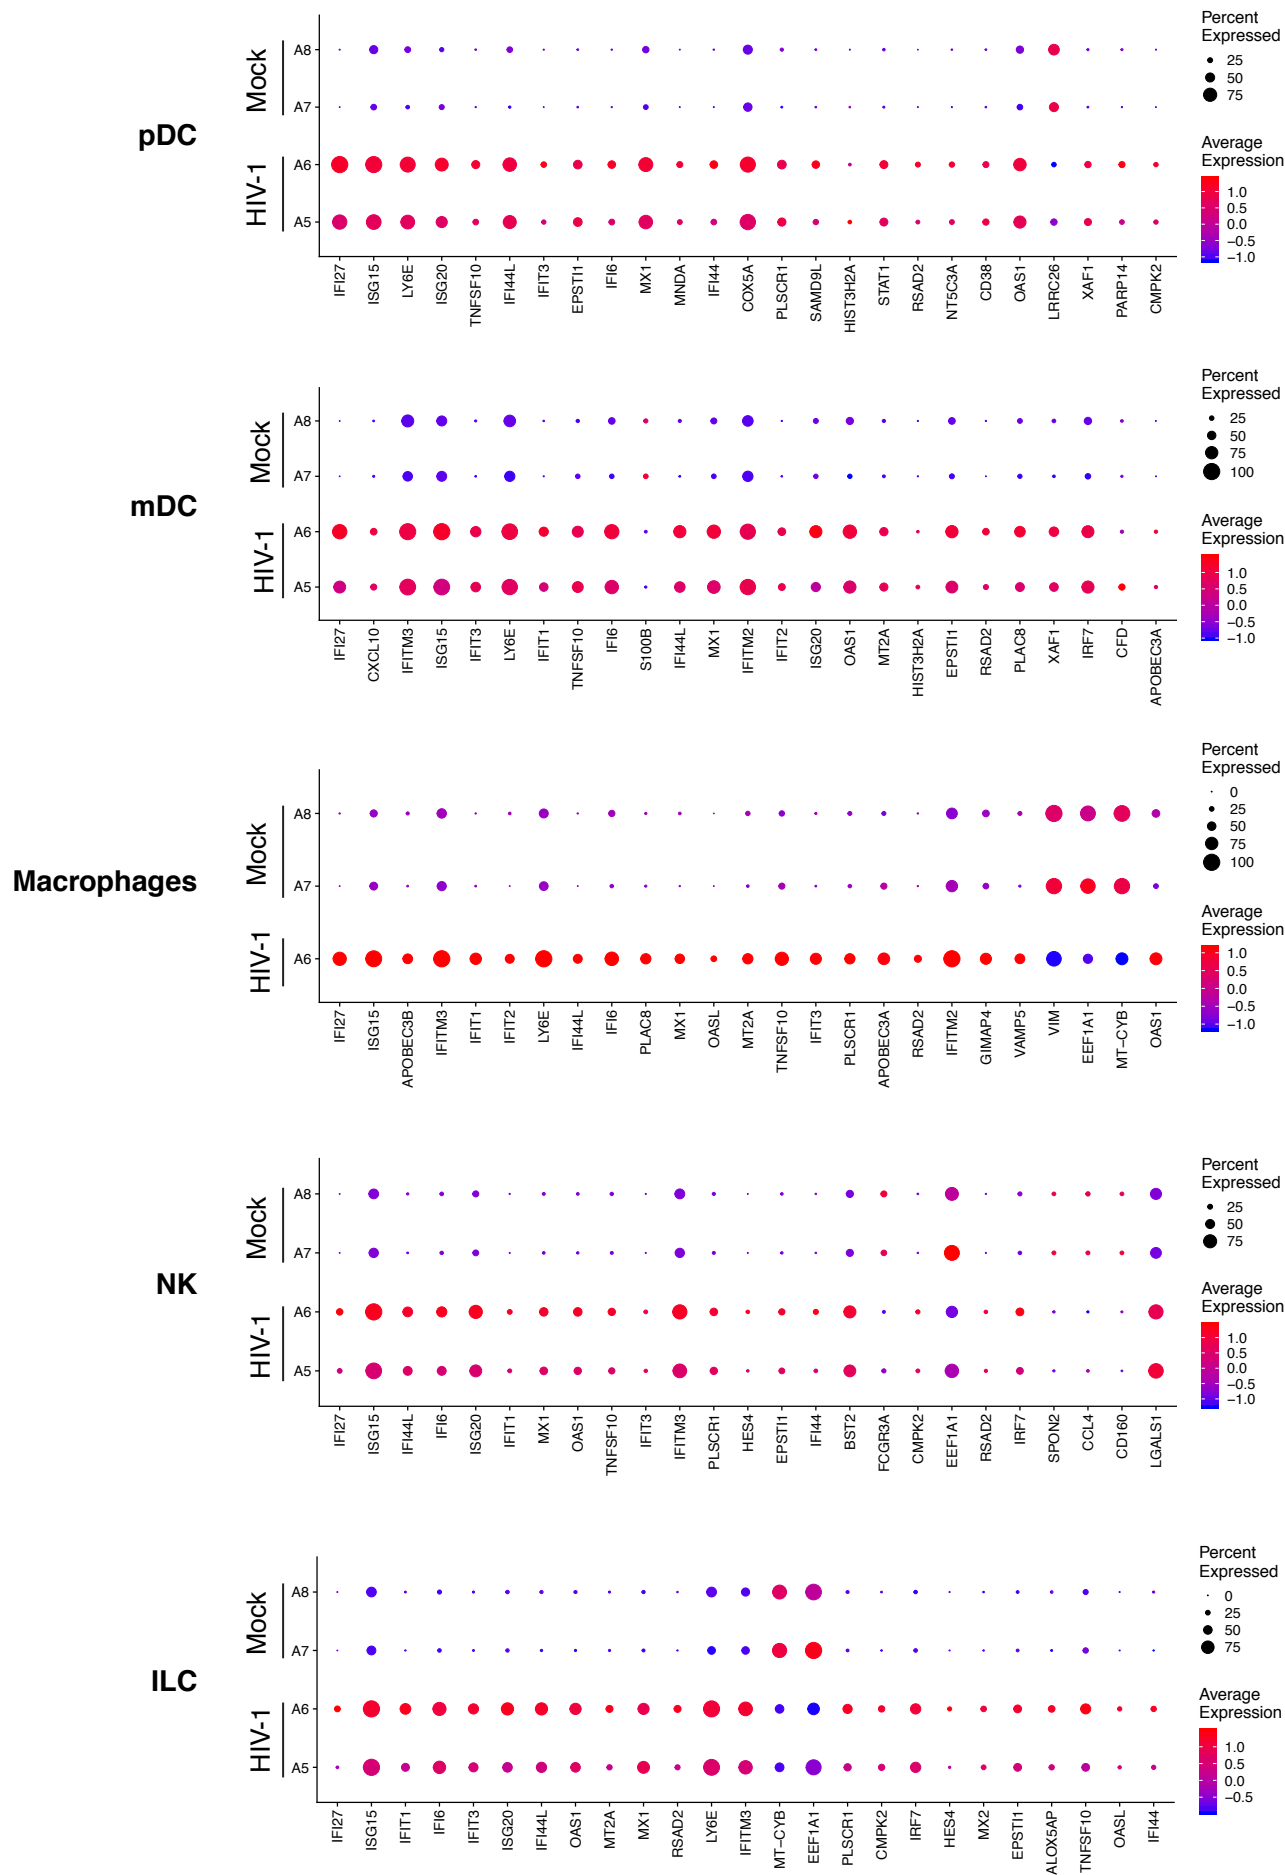

**Figure S2. Top 25 differential expressed genes in each innate immune subset.** Experiments were performed as in Figure 2. Dot plot of top 25 differentially expressed genes in each of the pDC, mDC, macrophages, NK and ILC populations between mock and HIV-1 infected NRG-hu HSC mice were shown.



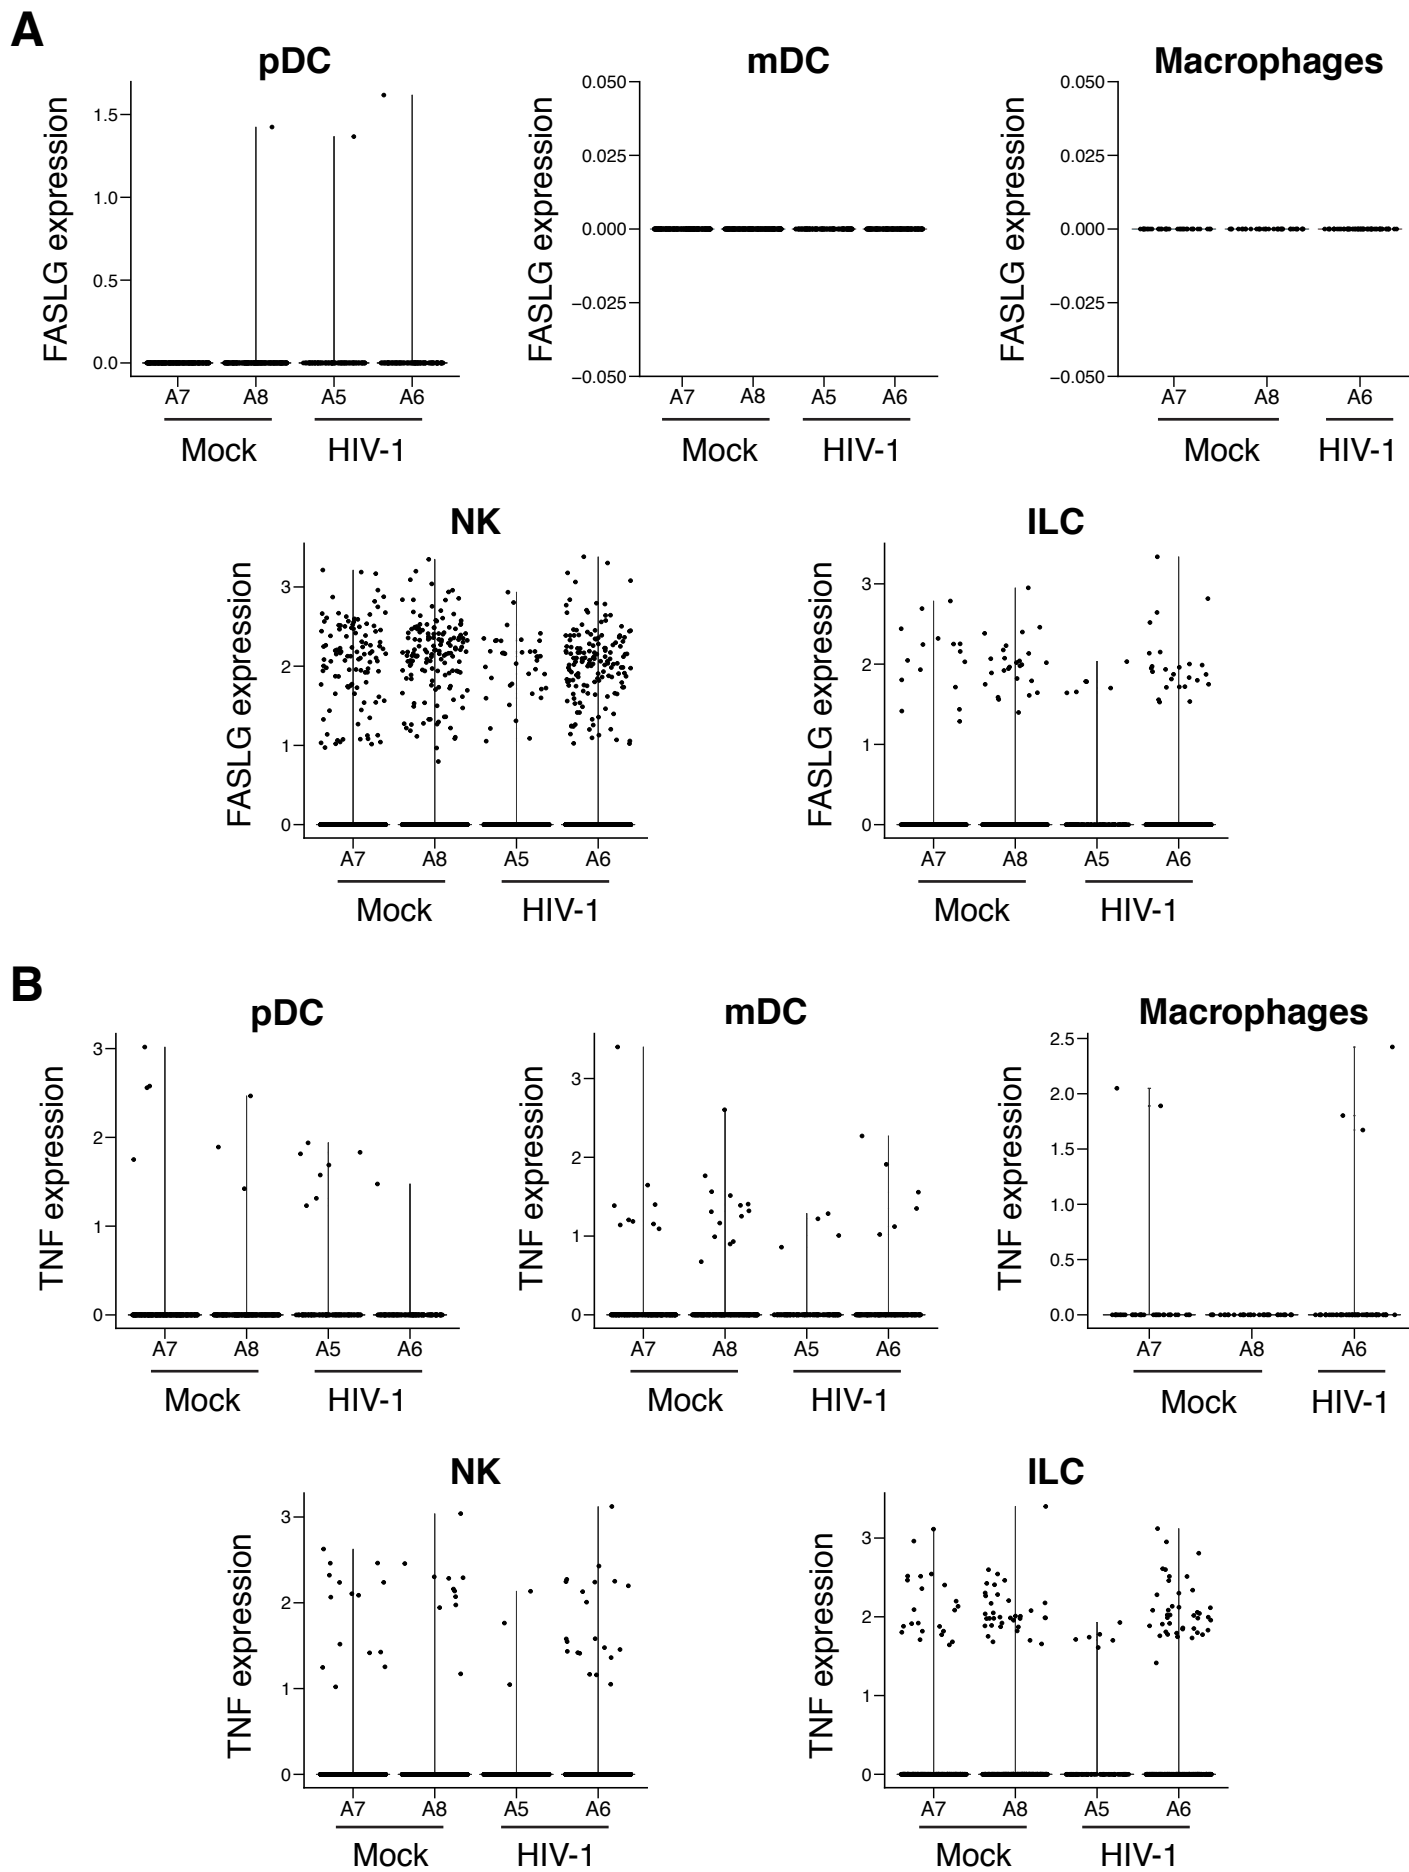

**Figure S3. Expression of Fas ligand and TNF- $\alpha$  genes in different innate immune cells from mock or HIV-1 infected mice.** Experiments were performed as in Figure 2. Violin plot of normalized unique molecular identifier (UMI) showing distribution of Fas ligand (FASLG) and TNF- $\alpha$  (TNF) gene expression in different innate immune cells from mock or HIV-1 infected mice. A5, A6, A7 and A8 are the mouse identification number.

Figure S4

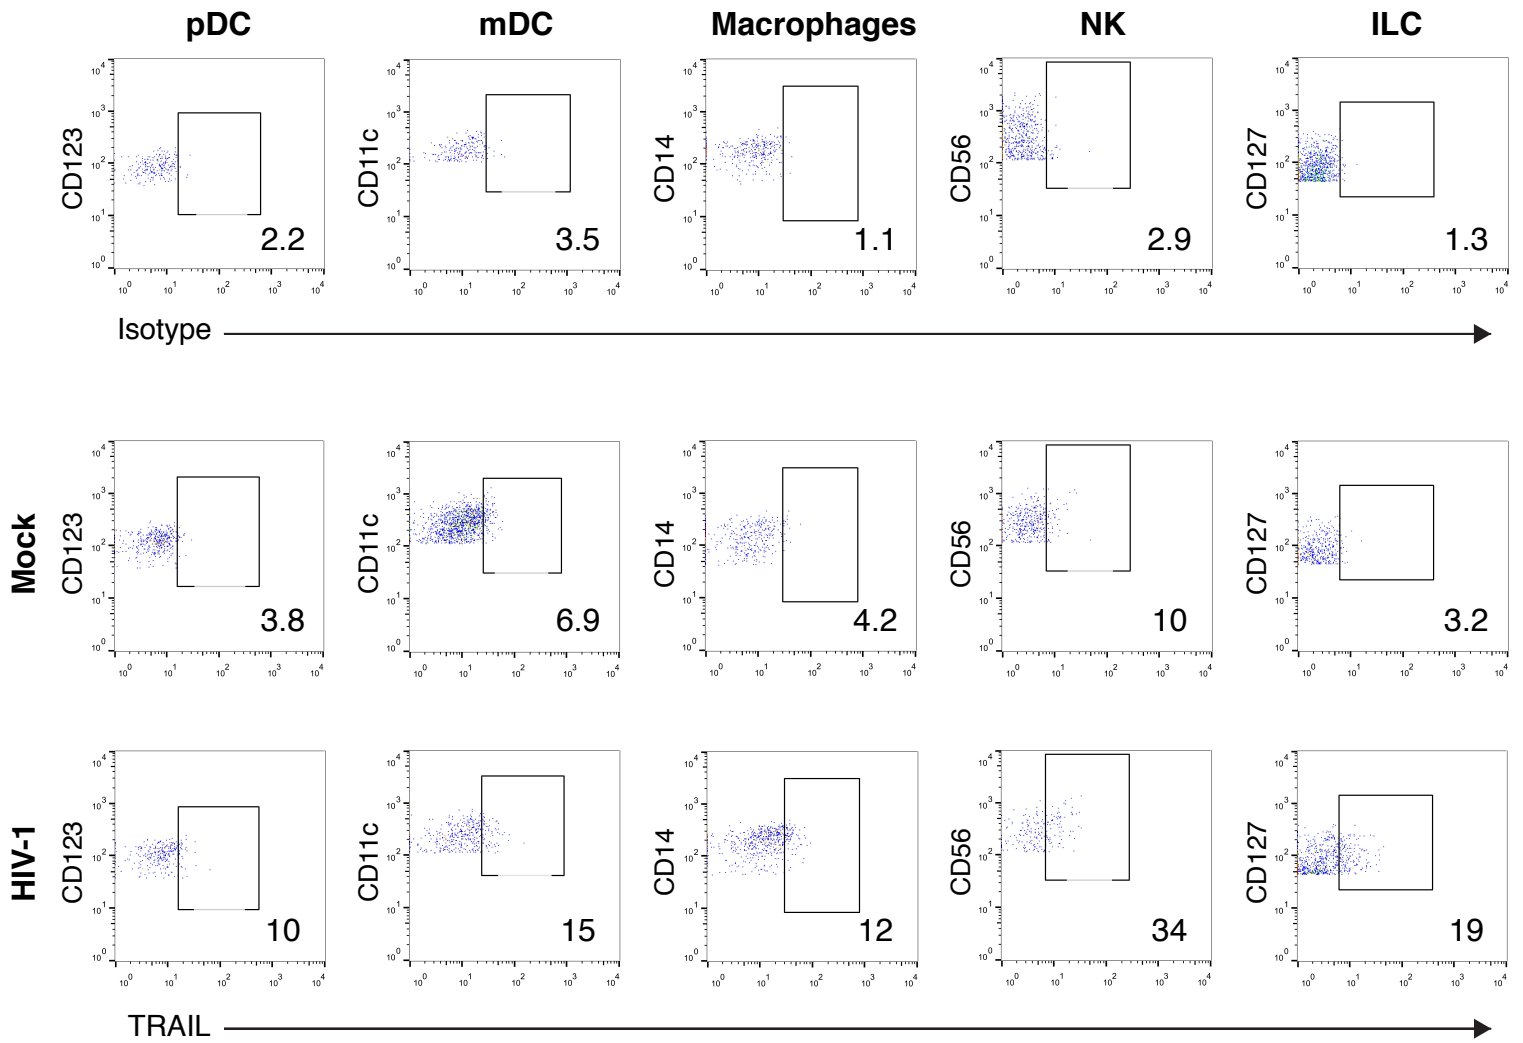

**Figure S4. FACS plots for TRAIL protein expression.** FACS plots show TRAIL protein expression on human pDC (hCD45<sup>+</sup>CD3<sup>-</sup>CD19<sup>-</sup>CD4<sup>+</sup>CD123<sup>+</sup>), mDC (hCD45<sup>+</sup>CD3<sup>-</sup>CD19<sup>-</sup>CD56<sup>-</sup>CD11c<sup>+</sup>CD14<sup>-</sup>), macrophage/monocyte (hCD45<sup>+</sup>CD3<sup>-</sup>CD19<sup>-</sup>CD56<sup>-</sup>CD14<sup>+</sup>), NK (hCD45<sup>+</sup>CD3<sup>-</sup>CD19<sup>-</sup>CD56<sup>+</sup>) and ILC (hCD45<sup>+</sup>CD3<sup>-</sup>CD11c<sup>-</sup>CD14<sup>-</sup>CD16<sup>-</sup>CD19<sup>-</sup>CD20<sup>-</sup>CD56<sup>-</sup>CD123<sup>-</sup>CD127<sup>+</sup>) from mock and HIV-1 infected mice.

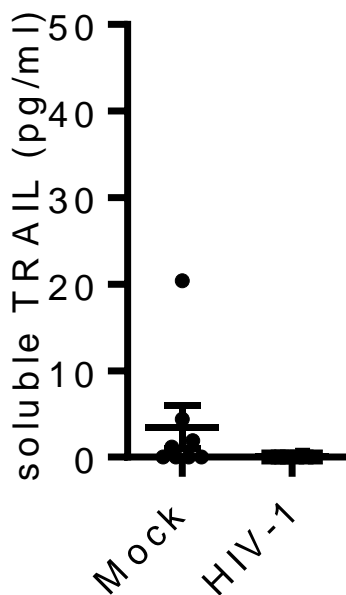

**Figure S5. Detection of soluble TRAIL in serum of HIV-1 infected NRG-hu HSC mice.** Summarized data of soluble TRAIL levels in the plasma of mock and HIV-1 infected mice 3-5 weeks post infection. Mock, n=8; HIV-1, n=8. Combined data from 2 independent experiments.

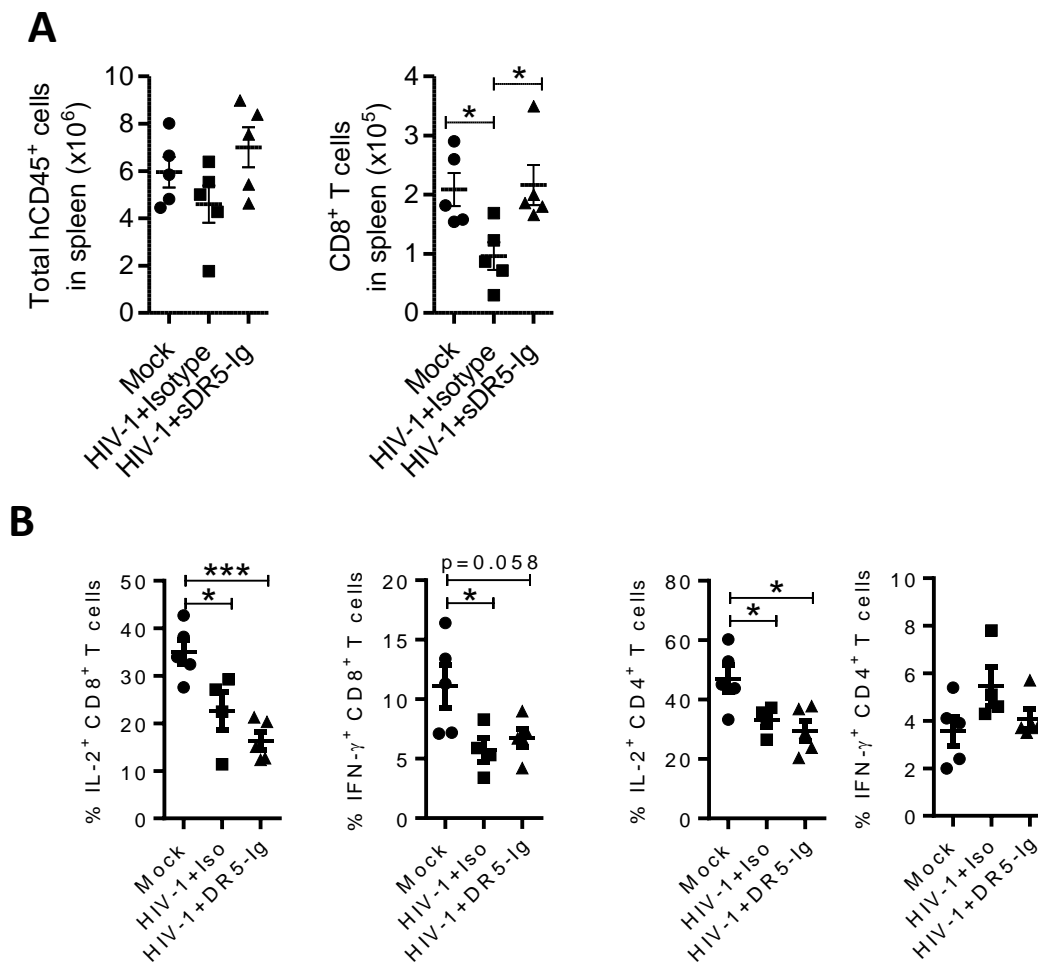

**Figure S6. Analysis of human T cell number and function in HIV-1 infected mice with sDR5-Ig or control Ig treatment.** NRG-hu HSC mice were treated as in figure 4 B-E. **(A)** Numbers of total human leukocytes (CD45<sup>+</sup>) and human CD8<sup>+</sup> T cells (CD3<sup>+</sup>CD8<sup>+</sup>) in spleens at termination (day 35) are summarized. **(B)** At termination, splenocytes were stimulated ex vivo with PMA/ionomycin for 4 hours followed by intracellular cytokine staining. Summarized data show percentages of IFN-γ and IL-2 producing CD8<sup>+</sup> and CD4<sup>+</sup> T cells.
